# Supplementary material for: Sensitivity to PRIMA-1MET is associated with decreased MGMT in human glioblastoma cells and glioblastoma stem cells irrespective of p53 status
Source: PubMed Central journal article supplement (PMC5312382; doi:10.18632/oncotarget.11197), 2016-08-11
Supplement: oncotarget-07-60245-s001.pdf [file oncotarget-07-60245-s001.pdf]

## Sensitivity to PRIMA-1<sup>MET</sup> is associated with decreased MGMT in human glioblastoma cells and glioblastoma stem cells irrespective of p53 status

### SUPPLEMENTARY FIGURES AND TABLES

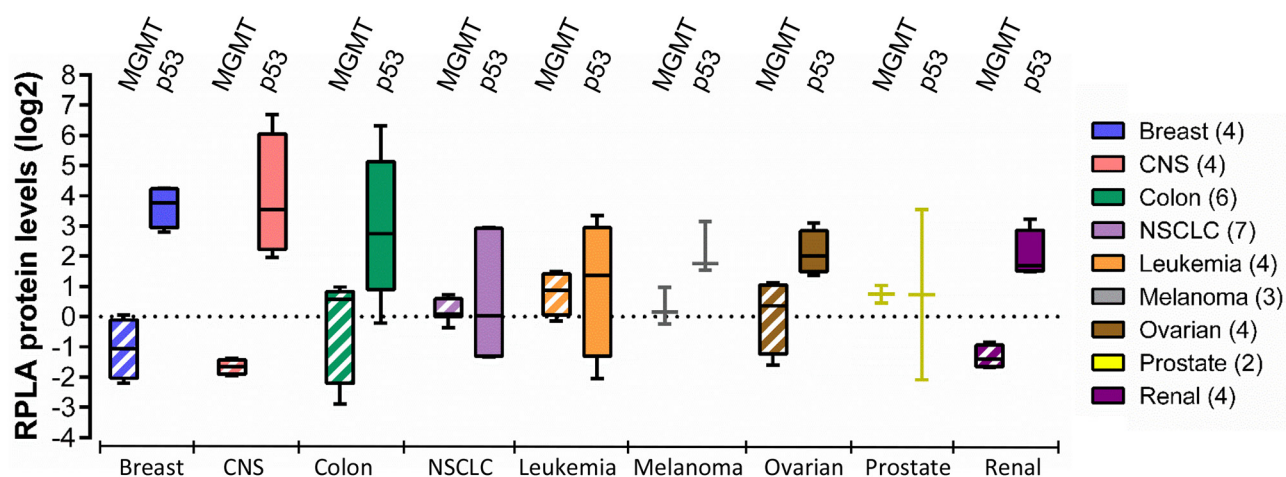

| Protein | Primary site |       |       |       |          |          |         |          |        |
|---------|--------------|-------|-------|-------|----------|----------|---------|----------|--------|
|         | Breast       | CNS   | Colon | NSCLC | Leukemia | Melanoma | Ovarian | Prostate | Renal  |
| MGMT    | -1.07        | -1.65 | 0.58  | 0.09  | 0.875    | 0.16     | 0.365   | 0.745    | -1.395 |
| mutp53  | 3.78         | 3.555 | 2.745 | 0.04  | 1.375    | 1.75     | 2.02    | 0.73     | 1.69   |

**Supplementary Figure S1: Correlation between mutp53 and MGMT protein levels in the NCI-60 cell line panel.** Box and whisker plots (min-max, the horizontal line indicates median) of MGMT (dashed pattern fill) and p53 (solid fill) protein levels (from reverse-phase protein lysate microarrays, RPLA, log<sub>2</sub>) in NCI-60 cell lines with mutant *TP53* (n = 38) derived from 9 different cancer types. The median MGMT and p53 protein (RPLA) values for cell lines within each primary site are indicated in the table below the graph. CNS – central nervous system; NSCLC - Non-small cell lung cancer.

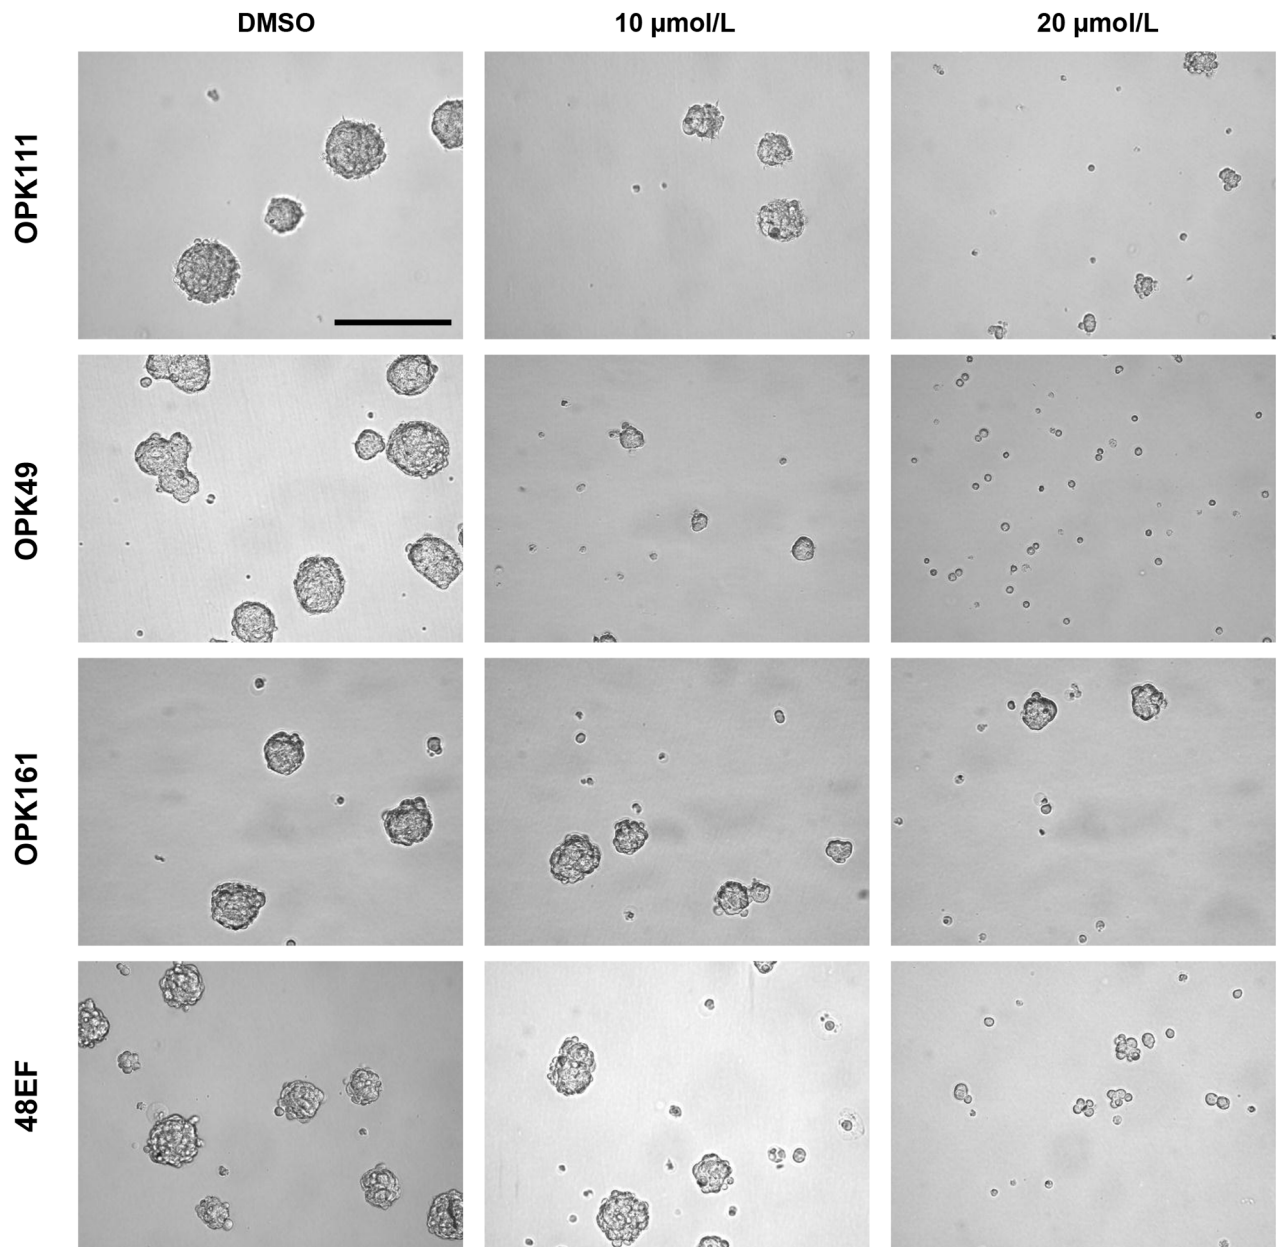

**Supplementary Figure S2: Effect of PRIMA-1<sup>MET</sup> on cell viability of GSCs.** Representative micrographs of OPK111, OPK49, OPK161 and 48EF GSCs (original magnification 200X) treated with PRIMA-1<sup>MET</sup> (10 or 20 μM) or DMSO control at 72-hour time point. Scale bar = 200 μm.

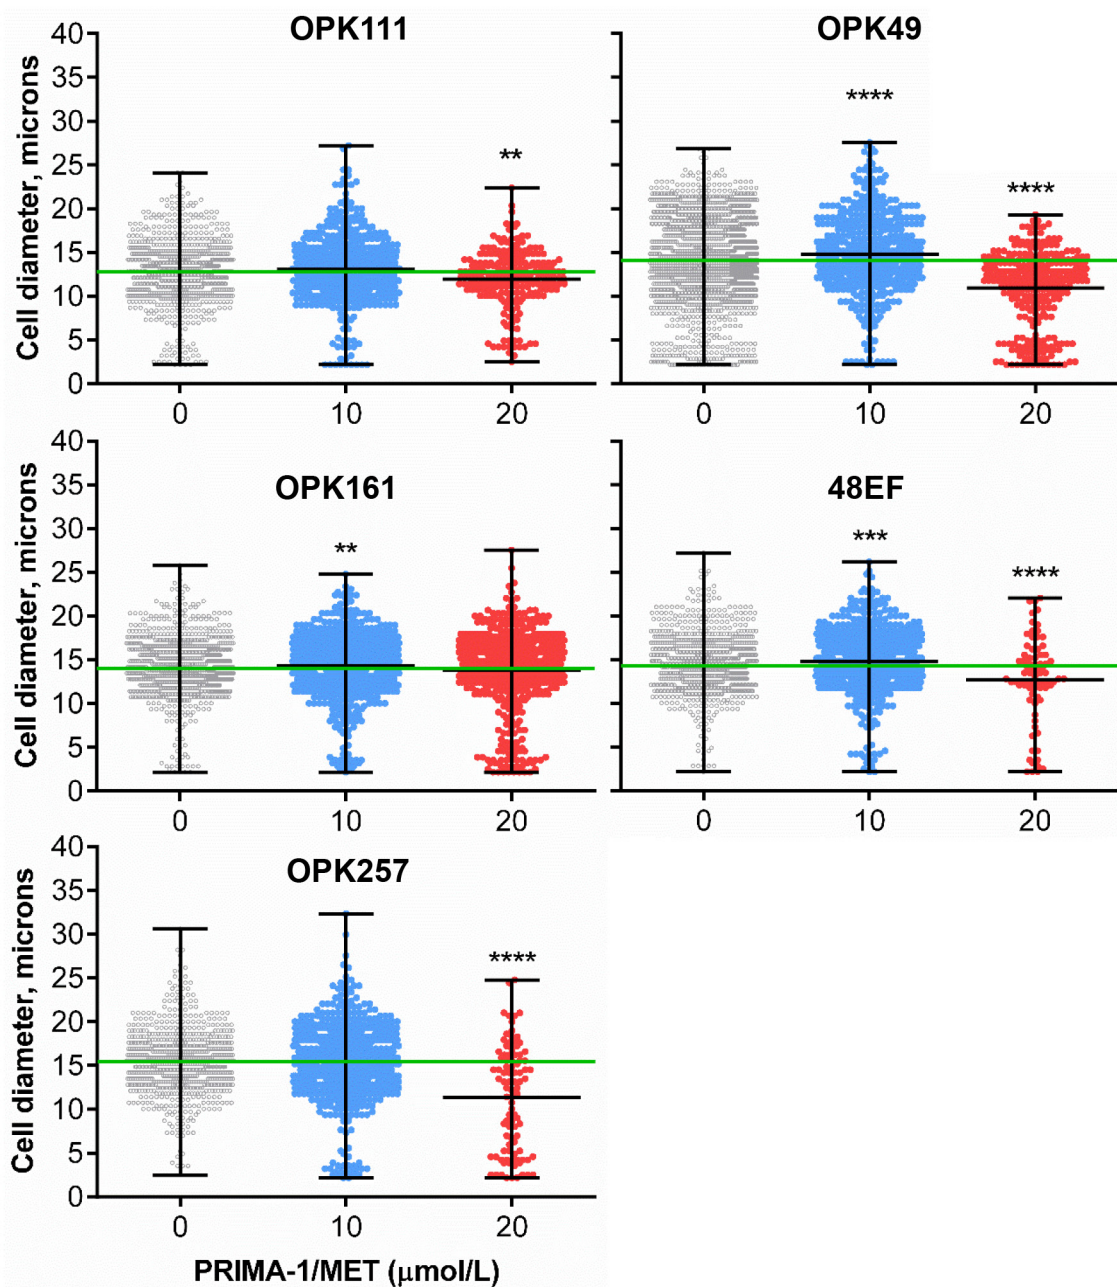

**Supplementary Figure S3: Effect of PRIMA-1<sup>MET</sup> on cell diameter of GSCs.** Scatter plots (a range, individual horizontal lines indicate mean) of cell diameter in OPK111, OPK49, OPK161, 48EF and OPK257 GSCs treated with PRIMA-1<sup>MET</sup> (10 or 20 μM) or DMSO control at 72-hour time point. The common horizontal line indicates mean cell diameter in DMSO control. \*, statistically significant difference (p < 0.05) compared to DMSO control.

**Supplementary Table S1: Normalized mRNA expression data (z-score values) of MGMT and p53 and *TP53* status in Cancer Cell Line Encyclopedia (CCLE) human cancer cell lines dataset.**

See Supplementary File 1

**Supplementary Table S2: MGMT and p53 protein levels (from reverse-phase protein lysate microarrays, RPLA) and *TP53* status in the NCI-60 cell lines panel. WT- wild-type, MT – mutant.**

See Supplementary File 2

**Supplementary Table S3: *TP53* (exons 3-11) sequence in T98/EV, T98/shRNA, U87MG and A172 GBM cell lines. The point mutations are indicated in bold red. Heterozygous single nucleotide polymorphism is specified with the alternate bases separated by a slash.**

See Supplementary File 3
